# Supplementary material for: No Effect of Diet-Induced Mild Hyperhomocysteinemia on Vascular Methylating Capacity, Atherosclerosis Progression, and Specific Histone Methylation
Source: Nutrients. 2020 Jul 23;12(8):2182. doi: 10.3390/nu12082182 (PMC7468910; doi:10.3390/nu12082182)
Supplement: Supplementary file 1 [file nutrients-12-02182-s001.pdf]

**Table S1.** Composition of the experimental diets (Control; HF, High Fat; HFLM, High Fat Low Methyl).

| Ingredient                             | Control |      | HF  |      | HFLM |      |
|----------------------------------------|---------|------|-----|------|------|------|
|                                        | gm      | Kcal | gm  | Kcal | gm   | Kcal |
| Casein                                 | 180     | 720  | 184 | 736  | 184  | 736  |
| Corn Starch                            | 431     | 1725 | 217 | 868  | 216  | 866  |
| Maltodextrin 10                        | 155     | 620  | 93  | 372  | 93   | 372  |
| Sucrose                                | 100     | 400  | 102 | 408  | 102  | 408  |
| Cellulose                              | 35      | 0    | 35  | 0    | 35   | 0    |
| Cocoa Butter                           | 0       | 0    | 155 | 1395 | 155  | 1395 |
| Primex                                 | 25      | 225  | 0   | 0    | 0    | 0    |
| Corn Oil                               | 25      | 225  | 25  | 225  | 25   | 225  |
| Mineral Mix S1000                      | 35      | 0    | 35  | 0    | 35   | 0    |
| Vitamin Mix V10001                     | 10      | 40   | 10  | 40   | 0    | 0    |
| Vitamin Mix V14904 <sup>1</sup>        | 0       | 0    | 0   | 0    | 10   | 40   |
| L-Cystine                              | 3       | 12   | 3   | 12   | 3    | 12   |
| L-Methionine                           | 0       | 0    | 0   | 0    | 3.2  | 13   |
| Choline bitartrate                     | 2.5     | 0    | 2.5 | 0    | 0    | 0    |
| Cholesterol                            | 0       | 0    | 11  | 0    | 11   | 0    |
| Pyridoxine HCl ( $\times 10^3$ )       | 0       | 0    | 0   | 0    | 0.2  | 0    |
| Folic acid ( $\times 10^3$ )           | 0       | 0    | 0   | 0    | 0.1  | 0    |
| Cyanocobalamin, 0.1% ( $\times 10^6$ ) | 0       | 0    | 0   | 0    | 2    | 0    |
| Succinylsulfathiazole                  | 8.6     | 0    | 8.6 | 0    | 8.6  | 0    |

<sup>1</sup> Without vitamin B6, B9 or B12.

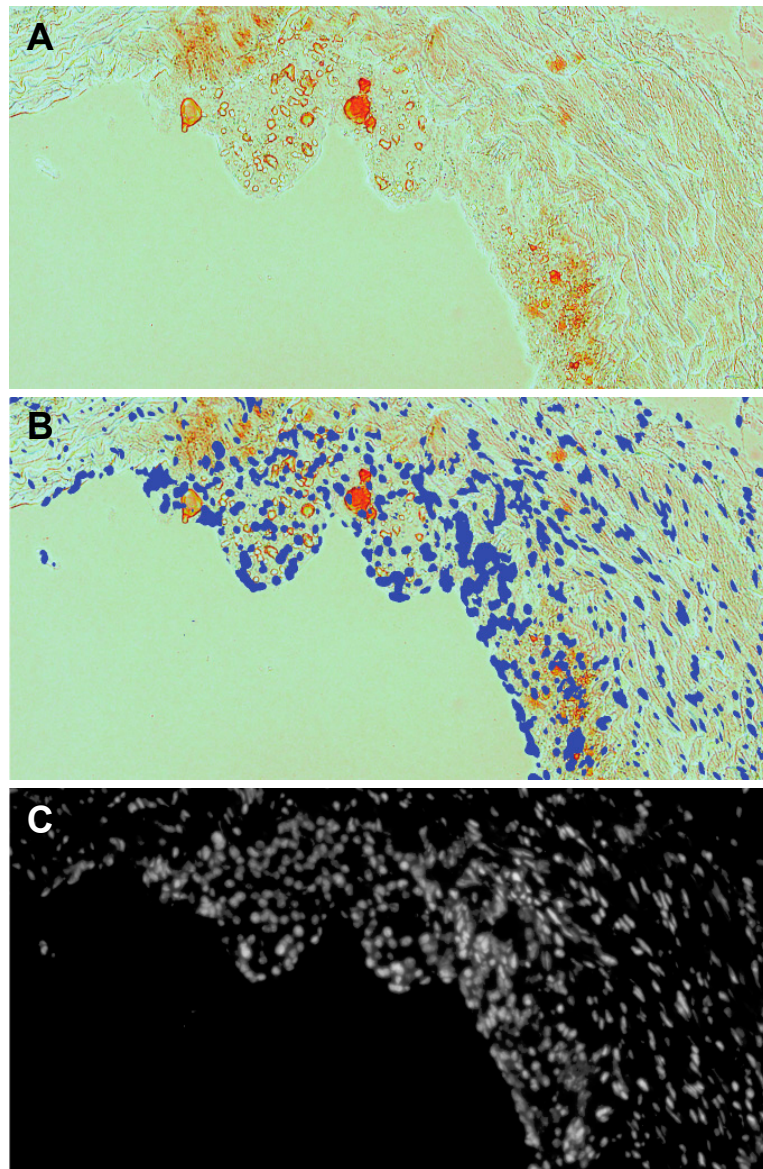

**Figure S1.** Lack of fluorescence from Oil Red O post processing for IF detection. As Oil Red O has been shown to have fluorescence [31], we needed to ensure that residual Oil Red O in our slides was not interfering with detection of the H3K27me3, as detected by an Alexa555 secondary antibody **A**. Residual Oil Red O in tissues post-processing for antibody detection was less prominent than on freshly sectioned slides (not shown); **B**. Overlay of H3K27me3 nuclei from panel **C** (Blue) onto the Oil Red O image from panel **A**. Note the absence of fluorescence from the most prominent Oil Red O deposits; **C**. Fluorescence microscopy image of anti-H3K27me3 detected with Alexa555 conjugated secondary antibody using filtering for Texas Red. Although fluorescence, apparently from nuclei, is not always spatially separated from Oil Red O deposits, the residual Oil Red O deposits are not contributing fluorescence in our processed tissues.
